# Supplementary material for: An evaluation of systemic reforms of public hospitals: the Sanming model in China
Source: Oxford University Press journal article supplement (doi:10.1093/heapol/czx058), 2017-05-04
Supplement: Supplementary_Figures_and_Tables_czx058.pdf [file Supplementary_Figures_and_Tables_czx058.pdf]

Supplementary Table 1: Impact of reforms on other hospital performance variables

|                          | (1)                                             | (2)                                            | (3)                     | (4)                                                | (5)                                               |
|--------------------------|-------------------------------------------------|------------------------------------------------|-------------------------|----------------------------------------------------|---------------------------------------------------|
| Variables                | Log (diagnostic<br>test cost per<br>outpatient) | Log (diagnostic<br>test cost per<br>inpatient) | Log (fiscal<br>subsidy) | Log (outpatient<br>visits for private<br>hospital) | Log (inpatient<br>visits for private<br>hospital) |
| Reform                   | -0.0566<br>(0.0469)                             | 0.0516<br>(0.0701)                             | -0.0488<br>(0.164)      | 0.036<br>(0.129)                                   | 0.027<br>(0.191)                                  |
| Individual fixed effects | Y                                               | Y                                              | Y                       | Y                                                  | Y                                                 |
| Yearly fixed effects     | Y                                               | Y                                              | Y                       | Y                                                  | Y                                                 |
| Covariates included      | Y                                               | Y                                              | Y                       | Y                                                  | Y                                                 |
| R-square                 | 0.079                                           | 0.441                                          | 0.341                   | 0.92                                               | 0.88                                              |
| Observations             | 1,242                                           | 1,242                                          | 1,230                   | 62                                                 | 62                                                |

Notes: Standard errors clustered at the county level are reported in parentheses. Covariates include indicators of GDP per capita, public revenue per capita, public educational expenditures per capita, permanent resident population, the output in the primary industry as a share of GDP, and output in the secondary industry as a share of GDP. All control variables are measured at the county-level. \*\*\*, \*\*, and \* denote the significance at the 1%, 5%, and ten%t level respectively.

Supplementary Table 2: Placebo test I implemented to exclude the possibility that the main results are driven by some unobserved, time-varying heterogeneities between the treatment and control groups

| Panel A                            | (1)                                   | (2)                                  | (3)                                      | (4)                                     | (5)                                     |
|------------------------------------|---------------------------------------|--------------------------------------|------------------------------------------|-----------------------------------------|-----------------------------------------|
| Variables                          | Log (total cost per outpatient visit) | Log (drug cost per outpatient visit) | Log (total cost per inpatient admission) | Log (drug cost per inpatient admission) | Drug sales as a share of the total cost |
| Pseudo-reform<br>(Assumed in 2010) | 0.000404<br>(0.0233)                  | -0.00111<br>(0.0318)                 | 0.0282<br>(0.0197)                       | 0.0265<br>(0.0292)                      | 0.0229<br>(0.787)                       |
| Individual fixed effects           | Y                                     | Y                                    | Y                                        | Y                                       | Y                                       |
| Yearly fixed effects               | Y                                     | Y                                    | Y                                        | Y                                       | Y                                       |
| Covariates included                | Y                                     | Y                                    | Y                                        | Y                                       | Y                                       |
| R-squared                          | 0.091                                 | 0.236                                | 0.353                                    | 0.277                                   | 0.130                                   |
| Observations                       | 696                                   | 696                                  | 696                                      | 696                                     | 695                                     |
| Panel B                            | (1)                                   | (2)                                  | (3)                                      | (4)                                     |                                         |
| Variables                          | Log (outpatient visits)               | Log (inpatients admissions)          | Log(Bed occupancy rate)                  | Log (Days per inpatient)                |                                         |
| Pseudo-reform<br>(Assumed in 2010) | -0.0259<br>(0.0360)                   | -0.0680**<br>(0.0288)                | 0.0455<br>(3.295)                        | 0.0348<br>(0.0430)                      |                                         |
| Individual fixed effects           | Y                                     | Y                                    | Y                                        | Y                                       |                                         |
| Yearly fixed effects               | Y                                     | Y                                    | Y                                        | Y                                       |                                         |
| Covariates included                | Y                                     | Y                                    | Y                                        | Y                                       |                                         |
| R-squared                          | 0.503                                 | 0.629                                | 0.054                                    | 0.052                                   |                                         |
| Observations                       | 696                                   | 696                                  | 696                                      | 696                                     |                                         |

Notes: Standard errors clustered at the county level are reported in parentheses. Covariates and variable definitions are the same as those in Supplementary Table 1. \*\*\*, \*\* and \* denote the significance at the 1%, 5%, and 10% level respectively.

Supplementary Table 3: Placebo test II by assigning reform status to each one of other eight cities

|                 | (1)                                   | (2)                                      | (3)                                     | (4)                     | (5)                         |
|-----------------|---------------------------------------|------------------------------------------|-----------------------------------------|-------------------------|-----------------------------|
| Treatment Group | Log (total cost per outpatient visit) | Log (total cost per inpatient admission) | drug sales as a share of the total cost | Log (outpatient visits) | Log (inpatients admissions) |
| Sanming         | -0.0628**<br>(0.0311)                 | -0.346***<br>(0.0477)                    | -16.89***<br>(0.992)                    | -0.0948**<br>(0.0410)   | -0.0817<br>(0.0510)         |
| Fuzhou          | 0.221***<br>(0.0558)                  | -0.00468<br>(0.0224)                     | 4.190***<br>(0.999)                     | 0.0381<br>(0.0301)      | 0.0182<br>(0.0443)          |
| Xiamen          | -0.0105<br>(0.0649)                   | 0.0230<br>(0.0295)                       | -2.079<br>(1.547)                       | -0.110**<br>(0.0467)    | -0.0892*<br>(0.0529)        |
| Putian          | -0.0672**<br>(0.0264)                 | 0.0408**<br>(0.0186)                     | 1.680<br>(1.820)                        | -0.0808**<br>(0.0378)   | -0.0629*<br>(0.0316)        |
| Quanzhou        | -0.0549<br>(0.0597)                   | -0.0157<br>(0.0279)                      | 2.521<br>(1.711)                        | 0.0661<br>(0.0401)      | 0.0849<br>(0.0521)          |
| Zhangzhou       | -0.0534<br>(0.0540)                   | 0.0340<br>(0.0373)                       | -1.158<br>(1.102)                       | 0.0401<br>(0.0571)      | -0.0668<br>(0.112)          |
| Nanping         | -0.0478<br>(0.0670)                   | 0.0571<br>(0.0356)                       | 7.043***<br>(1.920)                     | -0.0702<br>(0.0684)     | -0.0231<br>(0.0850)         |
| Longyan         | 0.0429<br>(0.0859)                    | 0.0662*<br>(0.0377)                      | 2.532<br>(2.295)                        | 0.0307<br>(0.0626)      | 0.0902**<br>(0.0437)        |
| Ningde          | -0.0170<br>(0.0537)                   | 0.0518<br>(0.0313)                       | 3.888**<br>(1.673)                      | 0.101**<br>(0.0429)     | 0.131**<br>(0.0581)         |

Notes: To save space, the estimation results for drug cost per outpatient, drug cost per inpatient, bed occupancy rates, and days per inpatients are not shown here. The results for these dependent variables are similar to the results are shown here. Standard errors clustered at the county level are reported in parentheses. Hospital individual fixed effects and yearly fixed effects are controlled. Covariates and variable definitions are the same as those in Supplementary Table 1. \*\*\*, \*\*, and \* denote the significance at the 1%, 5%, and 10% level respectively.

**Supplementary Table 4: the estimated results of PSMDID**

|                                          | PSMDID                | Difference-in-Difference |
|------------------------------------------|-----------------------|--------------------------|
| Log (total cost per outpatient visit)    | -0.119*<br>(0.0691)   | -0.0628**<br>(0.0311)    |
| Log (drug cost per outpatient visit)     | -0.317***<br>(0.066)  | -0.346***<br>(0.0477)    |
| Log (total cost per inpatient admission) | -0.146***<br>(0.0347) | -0.168***<br>(0.0305)    |
| Log (drug cost per inpatient admission)  | -0.846***<br>(0.0624) | -0.823***<br>(0.0451)    |
| Drug sales as a share of the total cost  | -16.44***<br>(1.482)  | -16.89***<br>(0.992)     |
| Log (outpatient visits)                  | -0.00399<br>(0.0741)  | -0.0948**<br>(0.0410)    |
| Log (inpatients admissions)              | 0.00314<br>(0.0787)   | -0.0817<br>(0.0510)      |
| Log(Bed occupancy rate)                  | 0.00537<br>(0.0874)   | -0.0536<br>(0.0408)      |
| Log (Days per inpatient)                 | -0.876<br>(0.648)     | -0.456<br>(0.537)        |

Notes: Standard errors clustered at the county level are reported in parentheses. \*\*\*, \*\*, and \* denote the significance at the 1%, 5%, and 10% level respectively.

Supplementary Table 5: Excluding observations in Fuzhou & Xiamen

| Panel A                  | (1)                                   | (2)                                  | (3)                                      | (4)                                     | (5)                                |
|--------------------------|---------------------------------------|--------------------------------------|------------------------------------------|-----------------------------------------|------------------------------------|
| Variables                | Log (total cost per outpatient visit) | Log (drug cost per outpatient visit) | Log (total cost per inpatient admission) | Log (drug cost per inpatient admission) | Drug cost as a share of total cost |
| Reform                   | -0.0683**<br>(0.0338)                 | -0.350***<br>(0.0497)                | -0.171***<br>(0.0316)                    | -0.818***<br>(0.0459)                   | -16.90***<br>(1.059)               |
| Individual fixed effects | Y                                     | Y                                    | Y                                        | Y                                       | Y                                  |
| Yearly fixed effects     | Y                                     | Y                                    | Y                                        | Y                                       | Y                                  |
| Covariates included      | Y                                     | Y                                    | Y                                        | Y                                       | Y                                  |
| Observations             | 892                                   | 892                                  | 891                                      | 891                                     | 892                                |
| R square                 | 0.672                                 | 0.305                                | 0.468                                    | 0.608                                   | 0.663                              |
| Panel B                  | (1)                                   | (2)                                  | (3)                                      | (4)                                     |                                    |
| Variables                | Log (outpatient visits)               | Log (inpatient admissions)           | Log (bed occupancy rate)                 | Log (days per inpatient)                |                                    |
| Reform                   | -0.0883*<br>(0.0443)                  | -0.0827<br>(0.0573)                  | -0.0454<br>(0.0384)                      | -0.997*<br>(0.525)                      |                                    |
| Individual fixed effects | Y                                     | Y                                    | Y                                        | Y                                       |                                    |
| Yearly fixed effects     | Y                                     | Y                                    | Y                                        | Y                                       |                                    |
| Covariates included      | Y                                     | Y                                    | Y                                        | Y                                       |                                    |
| Observations             | 892                                   | 891                                  | 891                                      | 892                                     |                                    |
| R square                 | 0.602                                 | 0.600                                | 0.061                                    | 0.046                                   |                                    |

Notes: This table reports the results of regressions that exclude observations in Fuzhou and Xiamen. Standard errors clustered at the county level are reported in parentheses. Covariates and variable definitions are the same as those in Supplementary Table 1. \*\*\*, \*\*, and \* denote the significance at the 1%, 5%, and 10% level respectively.

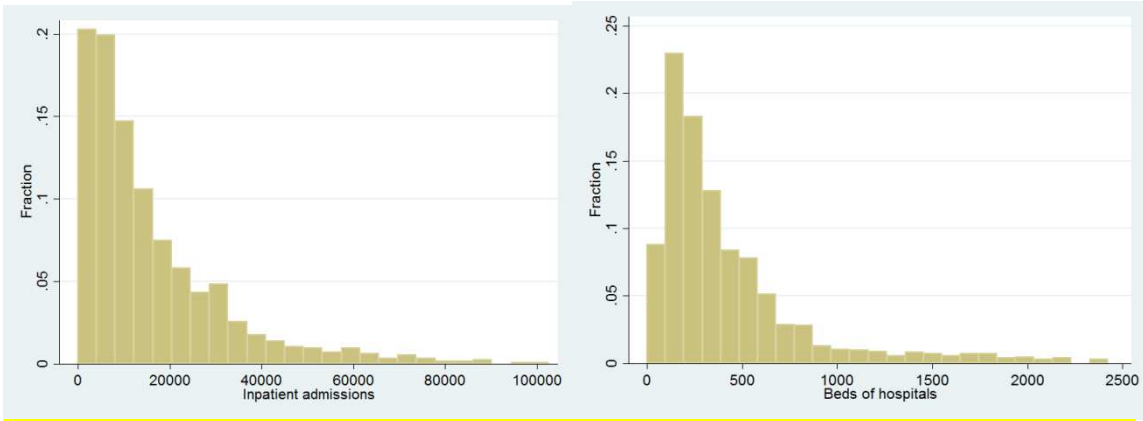

Supplementary Figure 1: the distribution of inpatient admissions and hospital beds
